# Supplementary material for: Genomic epidemiology of Chikungunya virus in Colombia reveals genetic variability of strains and multiple geographic introductions in outbreak, 2014
Source: PubMed Central journal article supplement (PMC6620336; doi:10.1038/s41598-019-45981-8), 2019-07-10
Supplement: 41598_2019_45981_MOESM1_ESM.pdf [file 41598_2019_45981_MOESM1_ESM.pdf]

# **Genomic epidemiology of *Chikungunya* virus in Colombia reveals genetic variability of strains and multiple geographic introductions in outbreak, 2014**

**Yeneiris Villero-Wolf<sup>1</sup>, Salim Mattar<sup>1,2\*</sup>, Andrés Puerta-González<sup>3</sup>, German Arrieta<sup>1,4</sup>, Carlos Muskus<sup>5</sup>, Richard Hoyos<sup>6</sup>, Hernando Pinzon<sup>7</sup>, Dioselina Peláez-Carvajal<sup>8</sup>.**

<sup>1</sup> Instituto de Investigaciones Biológicas del Trópico, Universidad de Córdoba, Montería, Córdoba, Colombia.

<sup>2</sup> Clínica Salud Social, Sincelejo, Sucre, Colombia.

<sup>3</sup> Universidad de Antioquia, Medellín, Antioquia, Colombia.

<sup>4</sup> Grupo de Salud Pública, Corporación Universitaria del Caribe-CECAR, Sincelejo, Sucre, Colombia.

<sup>5</sup> Programa de Estudio y Control de Enfermedades Tropicales (PECET), Facultad de Medicina, Universidad de Antioquia, Medellín, Antioquia, Colombia.

<sup>6</sup> Grupo de Investigación en Resistencia Bacteriana y Enfermedades Tropicales, Universidad del Sinú, Montería, Córdoba, Colombia.

<sup>7</sup> Universidad de Cartagena, Hospital Infantil Napoleon Franco, Cartagena, Colombia.

<sup>8</sup> Grupo de virología, Instituto Nacional de Salud. Bogotá DC, Colombia.

**Supplementary Table S1. Description of the genomes sequenced.** Lengths of each gene of each strain and percentage of homology is concerning to reference genome LN898093.

| Strain      | Lenght | Non-structural polyproteins |                          |                          |                          | Pro<br>(% of reference) | structural polyproteins |                        |                        |                        |                        |
|-------------|--------|-----------------------------|--------------------------|--------------------------|--------------------------|-------------------------|-------------------------|------------------------|------------------------|------------------------|------------------------|
|             |        | NSP1<br>(% of reference)    | NSP2<br>(% of reference) | NSP3<br>(% of reference) | NSP4<br>(% of reference) |                         | C<br>(% of reference)   | E3<br>(% of reference) | E2<br>(% of reference) | 6K<br>(% of reference) | E1<br>(% of reference) |
| CAR-61      | 11886  | 50-1654 (99.938)            | 1655-4045<br>(99.875)    | 4046-5626<br>(99.873)    | 5627-7459 (100)          | 7463-7527<br>(100)      | 7528-8310 (100)         | 8311-8502 (100)        | 8503-9771<br>(99.921)  | 9772-9954 (100)        | 9955-11271<br>(100)    |
| INS- 477150 | 12185  | 62-1666 (99.938)            | 1667-4057<br>(99.875)    | 4058-5638<br>(99.937)    | 5639-7471<br>(99.836)    | 7475-7539<br>(100)      | 7540-8322 (100)         | 8323-8514 (100)        | 8515-9783<br>(99.842)  | 9784-9966 (100)        | 9967-11283<br>(99.772) |
| OV-26       | 11709  | 61-1665<br>(100)            | 1666-4056<br>(99.916)    | 4057-5637<br>(99.937)    | 5638-7470 (100)          | 7474-7538<br>(100)      | 7539-8321 (100)         | 8322-8513 (100)        | 8514-9782<br>(99.921)  | 9783-9965 (100)        | 9966-11282<br>(99.924) |
| INS-449325  | 12183  | 61-1665 (99.875)            | 1666-4056<br>(99.875)    | 4057-5637<br>(99.937)    | 5638-7470<br>(99.945)    | 7474-7538<br>(100)      | 7539-8321 (100)         | 8322-8513 (100)        | 8514-9782<br>(99.921)  | 9783-9965<br>(99.454)  | 9966-11282<br>(99.772) |
| INS-449125  | 12128  | 62-1666 (99.875)            | 1667-4057<br>(99.916)    | 4058-5638<br>(99.810)    | 5639-7471<br>(99.891)    | 7475-7539<br>(100)      | 7540-8322<br>(99.872)   | 8323-8514 (100)        | 8515-9783<br>(99.921)  | 9784-9966 (100)        | 9967-11283<br>(100)    |
| P1          | 11959  | 61-1665<br>(100)            | 1666-4056<br>(99.833)    | 4057-5637<br>(99.810)    | 5638-7470<br>(99.891)    | 7474-7538<br>(100)      | 7539-8321 (100)         | 8322-8513 (100)        | 8514-9782<br>(99.685)  | 9783-9965 (100)        | 9966-11282<br>(99.924) |
| CAR-128     | 12043  | 61-1665 (99.938)            | 1666-4056<br>(99.833)    | 4057-5637<br>(99.873)    | 5638-7470 (100)          | 7474-7538<br>(100)      | 7539-8321 (100)         | 8322-8513 (100)        | 8514-9782<br>(99.921)  | 9783-9965 (100)        | 9966-11282<br>(100)    |
| CAR-3       | 12347  | 61-1665<br>(100)            | 1666-4056<br>(99.916)    | 4057-5637<br>(99.937)    | 5638-7470<br>(99.945)    | 7474-7538<br>(100)      | 7539-8321<br>(99.872)   | 8322-8513 (100)        | 8514-9782<br>(99.921)  | 9783-9965 (100)        | 9966-11282<br>(100)    |
| CAR-149     | 12306  | 61-1665<br>(100)            | 1666-4056<br>(99.916)    | 4057-5637<br>(99.937)    | 5638-7470 (100)          | 7474-7538<br>(100)      | 7539-8321 (100)         | 8322-8513 (100)        | 8514-9782<br>(99.921)  | 9783-9965 (100)        | 9966-11282<br>(100)    |
| CAR-4       | 11694  | 61-1665<br>(100)            | 1666-4056<br>(99.916)    | 4057-5637<br>(99.873)    | 5638-7470<br>(99.945)    | 7474-7538<br>(100)      | 7539-8321 (100)         | 8322-8513 (100)        | 8514-9782<br>(99.921)  | 9783-9965 (100)        | 9966-11282<br>(100)    |
| CAR-62      | 12270  | 61-1665<br>(100)            | 1666-4056<br>(99.916)    | 4057-5637<br>(99.937)    | 5638-7470 (100)          | 7474-7538<br>(100)      | 7539-8321 (100)         | 8322-8513 (100)        | 8514-9782<br>(99.921)  | 9783-9965 (100)        | 9966-11282<br>(100)    |
| 7 OV        | 12153  | 61-1665<br>(100)            | 1666-4056<br>(99.916)    | 4057-5637<br>(99.937)    | 5638-7470<br>(99.891)    | 7474-7538<br>(100)      | 7539-8321<br>(99.872)   | 8322-8513 (100)        | 8514-9782<br>(99.921)  | 9783-9965 (100)        | 9966-11282<br>(99.924) |
| CAR-89      | 12191  | 61-1665<br>(100)            | 1666-4056<br>(99.875)    | 4057-5637<br>(99.937)    | 5638-7470<br>(99.945)    | 7474-7538<br>(100)      | 7539-8321<br>(99.872)   | 8322-8513 (100)        | 8514-9782<br>(99.921)  | 9783-9965 (100)        | 9966-11282<br>(100)    |
| OV-13       | 12086  | 62-1666<br>(100)            | 1667-4057<br>(99.916)    | 4058-5638<br>(99.937)    | 5639-7471 (100)          | 7475-7539<br>(100)      | 7540-8322 (100)         | 8323-8514 (100)        | 8515-9783<br>(99.921)  | 9784-9966 (100)        | 9967-11283<br>(100)    |
| OV-16       | 12160  | 61-1665<br>(100)            | 1666-4056<br>(99.875)    | 4057-5637<br>(99.937)    | 5638-7470 (100)          | 7474-7538<br>(100)      | 7539-8321 (100)         | 8322-8513 (100)        | 8514-9782<br>(99.921)  | 9783-9965 (100)        | 9966-11282<br>(100)    |
| M6          | 11694  | 74-1678 (99.938)            | 1679-4069<br>(99.916)    | 4070-5650<br>(99.937)    | 5651-7483 (100)          | 7487-7551<br>(100)      | 7552-8334 (100)         | 8335-8526 (100)        | 8527-9795<br>(99.921)  | 9796-9978 (100)        | 9979-11295<br>(100)    |

**Supplementary Figure S2. Bayesian inference tree represented as cladogram.** Taxon labels include access number, country of isolation and year of collection. Subsequent probabilities  $\geq 0.80$  are labeled in each branch.

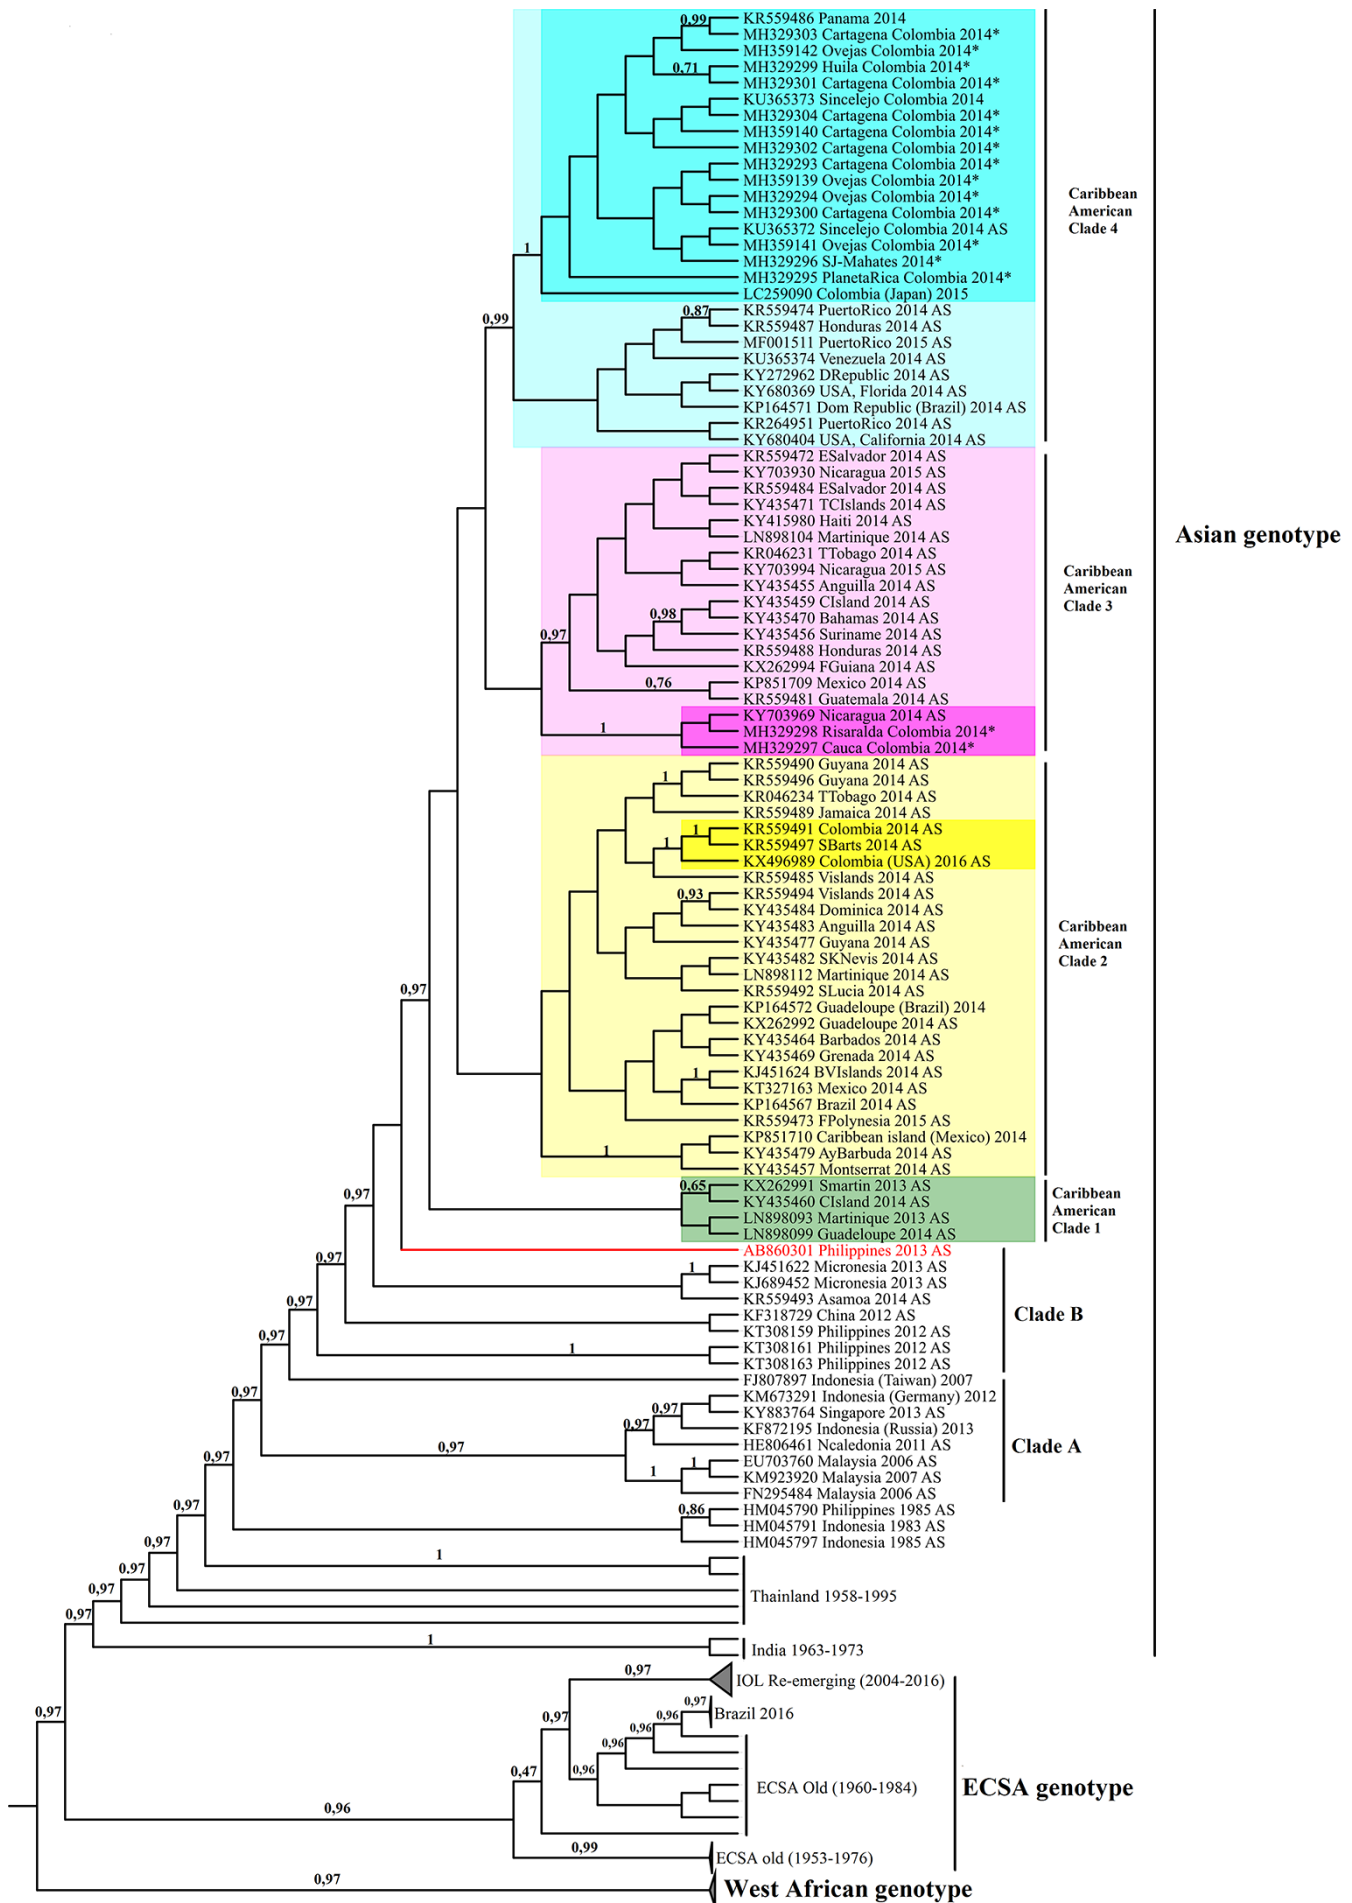



**Supplementary Table S4. Set of primers for genome amplification** (Stapleford *et al.* 2016)

|    | <b>Primer</b> | <b>Sequence (5'--3')</b>  | <b>Genome Region</b> | <b>Size (pb)</b> |
|----|---------------|---------------------------|----------------------|------------------|
| 1  | 1F            | CACGTAGCCTACCAGTTTCTTA    | 17- 2113             | 2096             |
|    | nsP2-2112J-R  | TTCTTGCAGCATCTTCTCTGGTCCA | 5' UTR – nsP2        |                  |
| 2  | 1F            | CACGTAGCCTACCAGTTTCTTA    | 17- 872              | 855              |
|    | 2R            | ATGGAACACCGATGGTAGGTG     | 5' UTR–nsP1          |                  |
| 3  | 3F            | AACCCCGTTCTAGTACAACGC     | 617-2679             | 2081             |
|    | 4R            | CGGCATGTTGTACTCATTCG      | nsP1–nsP2            |                  |
| 4  | 5F            | CGAATTCGACAGCTTTGTAG      | 1411-3590            | 2179             |
|    | 6R            | GCACATGATGTCCGTTTATC      | nsP1–nsP2            |                  |
| 5  | 7F            | GACCAAGACTGAAAGTTGTAC     | 2490-4735            | 2237             |
|    | 8R            | CCACATAGTATGTATCTCTGC     | nsP2–nsP3            |                  |
| 6  | 9F            | GCGTACTGGGACGTAAGTTTA     | 3897-5824            | 1926             |
|    | 10R           | GGACGCACTCTCCTGGAGTTTC    | nsP2–nsP3            |                  |
| 7  | 11F           | CTGTACGGGAAGTGAGTATGAC    | 5064-6949            | 1903             |
|    | 12R           | CATACCGGATTTTCATCATAGC    | nsP3–nsP4            |                  |
| 8  | 13F           | GGAGACGCCGTTTTAGAAACG     | 6748-8021            | 1283             |
|    | 14R           | CGCTTGAAGGCCAATTTGGCC     | nsP4–capside         |                  |
| 9  | 15F           | GCAGAGAGAGAATGTGCATG      | 7856-9799            | 1945             |
|    | 16R           | CCGCTTTAGCTGTTCTAATGC     | capside- E2          |                  |
| 10 | 17F           | GGAACACTCTTGCAGCACGTAC    | 8976-10989           | 2008             |
|    | 18R           | GGCGTTAGTCATCGAGTGCAC     | E2–E1                |                  |
| 11 | 19F           | GTACAGCAGAGTGTAAGGACCA    | 10172-11993          | 1821             |
|    | 22R           | AACATCTCCTACGTCCCTATGG    | E1–3'UTR             |                  |
| 12 | 21F           | GAACATGCCTATCTCCATCGAC    | 10803-11993          | 1196             |
|    | 22R           | AACATCTCCTACGTCCCTATGG    | E1–3'UTR             |                  |

**Supplementary Table S5. CHIKV whole genome sequences used in phylogenetic analyzes.** The strain name, GenBank accession number, country, collection date and host of the sequences used in phylogenetic analyses.

| Strain Name              | GenBank Accession | Country (Imported)          | year | GenBank Host               |
|--------------------------|-------------------|-----------------------------|------|----------------------------|
| CHIKV-13-112A            | AB860301          | Philippines                 | 2013 | <i>Homo sapiens</i>        |
| MY003IMR/06/BP           | EU703760          | Malaysia                    | 2006 | <i>Homo sapiens</i>        |
| 0706aTw                  | FJ807897          | Indonesia (Taiwan)          | 2007 | <i>Homo sapiens</i>        |
| MY/06/37348              | FN295483          | Malaysia                    | 2006 | <i>Homo sapiens</i>        |
| MY/06/37350              | FN295484          | Malaysia                    | 2006 | <i>Homo sapiens</i>        |
| NC/2011-568              | HE806461          | New Caledonia               | 2011 | <i>Homo sapiens</i>        |
| PO731460                 | HM045788          | India                       | 1973 | <i>Homo sapiens</i>        |
| PhH15483                 | HM045790          | Philippines                 | 1985 | <i>Homo sapiens</i>        |
| JKT23574                 | HM045791          | Indonesia                   | 1983 | <i>Homo sapiens</i>        |
| CO392-95                 | HM045796          | Thailand                    | 1995 | <i>Homo sapiens</i>        |
| RSU1                     | HM045797          | Indonesia                   | 1985 | <i>Homo sapiens</i>        |
| 3412-78                  | HM045808          | Thailand                    | 1978 | <i>Homo sapiens</i>        |
| TH35                     | HM045810          | Thailand                    | 1958 | <i>Homo sapiens</i>        |
| Gibbs 63-263             | HM045813          | India                       | 1963 | <i>Homo sapiens</i>        |
| 1455-75                  | HM045814          | Thailand                    | 1975 | <i>Homo sapiens</i>        |
| chik-sy                  | KF318729          | China                       | 2012 | <i>Homo sapiens</i>        |
| LEIV-CHIKV/Moscow/1/2013 | KF872195          | Indonesia ( Russia )        | 2013 | <i>Homo sapiens</i>        |
| 3807                     | KJ451622          | Micronesia                  | 2013 | <i>Homo sapiens</i>        |
| 99659                    | KJ451624          | British Virgin Islands      | 2014 | <i>Homo sapiens</i>        |
| Yap 13-2039              | KJ689452          | Micronesia                  | 2013 | <i>Ae. Aegypti</i>         |
| DH130003                 | KM673291          | Indonesia (Germany)         | 2012 | <i>Homo sapiens</i>        |
| M129                     | KM923920          | Malaysia                    | 2007 | <i>Macaca fascicularis</i> |
| AMA2798/H804298          | KP164567          | Brazil                      | 2014 | <i>Homo sapiens</i>        |
| PER10/H803609            | KP164571          | Dominican republic (Brazil) | 2014 | <i>Homo sapiens</i>        |
| TR206/ H804187           | KP164572.1        | Guadalupe (Brazil)          | 2014 | <i>Homo sapiens</i>        |
| InDRE 51CHIK             | KP851709          | Mexico                      | 2014 | <i>Homo sapiens</i>        |
| InDRE 4CHIK              | KP851710          | Caribe (Mexico)             | 2014 | <i>Homo sapiens</i>        |
| VE54_20                  | KR046231          | Trinidad and Tobago         | 2014 | <i>Homo sapiens</i>        |
| VE55_4                   | KR046234          | Trinidad and Tobago         | 2014 | <i>Homo sapiens</i>        |
| PR-S6                    | KR264951          | Puerto Rico                 | 2014 | <i>Homo sapiens</i>        |
| WHCHK3                   | KR559472          | El Salvador                 | 2014 | -                          |
| WHCHK4                   | KR559473          | French Polynesia            | 2015 | -                          |
| WHCHK5                   | KR559474          | Puerto Rico                 | 2014 | -                          |
| WHCHK10                  | KR559479.1        | Dominican Republic          | 2014 | -                          |
| WHCHK12                  | KR559481          | Guatemala                   | 2014 | -                          |
| WHCHK15                  | KR559484          | El Salvador                 | 2014 | -                          |
| WHCHK16                  | KR559485          | Virgin Islands              | 2014 | -                          |
| WHCHK17                  | KR559486          | Panama                      | 2014 | -                          |
| WHCHK18                  | KR559487          | Honduras                    | 2014 | -                          |
| WHCHK19                  | KR559488          | Honduras                    | 2014 | -                          |
| WHCHK20                  | KR559489          | Jamaica                     | 2014 | -                          |
| WHCHK21                  | KR559490          | Guyana                      | 2014 | -                          |
| WHCHK22                  | KR559491          | Colombia                    | 2014 | -                          |
| WHCHK23                  | KR559492          | Saint Lucia                 | 2014 | -                          |
| WHCHK24                  | KR559493.1        | American Samoa              | 2014 | -                          |
| WHCHK25                  | KR559494          | Virgin Islands              | 2014 | -                          |
| WHCHK27                  | KR559496          | Guyana                      | 2014 | -                          |
| WHCHK28                  | KR559497.1        | St.Barts                    | 2014 | -                          |
| CPCC007800Y01            | KT308159          | Philippines                 | 2012 | <i>Homo sapiens</i>        |
| CPCC017800Y01            | KT308160          | Philippines                 | 2012 | <i>Homo sapiens</i>        |
| CPCC065200Y01            | KT308161          | Philippines                 | 2012 | <i>Homo sapiens</i>        |
| CPCC083400Y01            | KT308162          | Philippines                 | 2012 | <i>Homo sapiens</i>        |
| CPCC095700Y01            | KT308163          | Philippines                 | 2012 | <i>Homo sapiens</i>        |
| CH0008                   | KT327163          | Mexico                      | 2014 | <i>Homo sapiens</i>        |
| 241                      | KU365372.1        | Colombia-Sincelejo          | 2014 | <i>Homo sapiens</i>        |
| 246                      | KU365373.1        | Colombia-Sincelejo          | 2014 | <i>Homo sapiens</i>        |

|                                                   |            |                                      |      |                                    |
|---------------------------------------------------|------------|--------------------------------------|------|------------------------------------|
| 257263                                            | KU365374   | Venezuela                            | 2014 | <i>Homo sapiens</i>                |
| CHIKV/Homo sapiens/THA/6307-88/1988               | KX262988   | Thailand                             | 1988 | <i>Homo sapiens</i>                |
| CHIKV/Homo sapiens/SXM/H-20235-STMARTIN-2013/2003 | KX262991   | Saint Martin                         | 2013 | <i>Homo sapiens</i>                |
| CHIKV/Homo sapiens/GLP/YO-111213/2014             | KX262992   | Guadeloupe                           | 2014 | <i>Homo sapiens</i>                |
| CHIKV/Homo sapiens/GUF/YO-123223/2014             | KX262994   | French Guiana                        | 2014 | <i>Homo sapiens</i>                |
| Homo sapiens/COL/UF-1/2016                        | KX496989   | Colombia-Bogotá (USA)                | 2016 | <i>Homo sapiens</i>                |
| N594                                              | KY272962   | Dominican Republic                   | 2014 | <i>Homo sapiens</i>                |
| Haiti-5/2014                                      | KY415980   | Haiti                                | 2014 | <i>Homo sapiens</i>                |
| Haiti-10/2014                                     | KY415985   | Haiti                                | 2014 | <i>Homo sapiens</i>                |
| 1.406.523                                         | KY435455.1 | Anguilla                             | 2014 | <i>Homo sapiens</i>                |
| 14.06350                                          | KY435456   | Suriname                             | 2014 | <i>Homo sapiens</i>                |
| 1.406.252                                         | KY435457   | Montserrat                           | 2014 | <i>Homo sapiens</i>                |
| 1.405.085                                         | KY435459   | Cayman Island                        | 2014 | <i>Homo sapiens</i>                |
| 1.405.081                                         | KY435460   | Cayman Island                        | 2014 | <i>Homo sapiens</i>                |
| 14.04425                                          | KY435464   | Barbados                             | 2014 | <i>Homo sapiens</i>                |
| 14.03562                                          | KY435469   | Grenada                              | 2014 | <i>Homo sapiens</i>                |
| 1.402.961                                         | KY435470   | Bahamas                              | 2014 | <i>Homo sapiens</i>                |
| 14.02585                                          | KY435471   | Turks and Caicos Islands             | 2014 | <i>Homo sapiens</i>                |
| 1.402.217                                         | KY435477   | Guyana                               | 2014 | <i>Homo sapiens</i>                |
| 1.401.526                                         | KY435479   | Antigua y Barbuda                    | 2014 | <i>Homo sapiens</i>                |
| 14.01152                                          | KY435482   | Saint Kitts and Nevis                | 2014 | <i>Homo sapiens</i>                |
| 1.400.686                                         | KY435483.1 | Anguilla                             | 2014 | <i>Homo sapiens</i>                |
| 14.00448                                          | KY435484   | Dominica                             | 2014 | <i>Homo sapiens</i>                |
| Homo Sapiens /USA/CKVHHL_26/2014                  | KY680351.1 | USA                                  | 2014 | <i>Homo sapiens</i>                |
| CHIKV/Homo sapiens/USA/CKVHL_22/2014              | KY680369   | USA                                  | 2014 | <i>Homo sapiens</i>                |
| CHIKV/Homo sapiens/USA/CKVHL_67/2014              | KY680404   | USA                                  | 2014 | <i>Homo sapiens</i>                |
| Homo Sapiens /NIC/4912.12.A.1 /2015               | KY703930.1 | Nicaragua                            | 2015 | <i>Homo sapiens</i>                |
| CHIKV/Homo sapiens/NIC/1773.1C/2014               | KY703969   | Nicaragua                            | 2014 | <i>Homo sapiens</i>                |
| CHIKV/Homo sapiens/NIC/13724-15/2015              | KY703994   | Nicaragua                            | 2015 | <i>Homo sapiens</i>                |
| SGEHICH02971Y13                                   | KY883764   | Singapore                            | 2013 | <i>Homo sapiens</i>                |
| Chikv/Hu/Colombia/NIID02/2015                     | LC259090.1 | Colombia (Japan)                     | 2015 | <i>Homo sapiens</i>                |
| M100                                              | LN898093   | Martinique                           | 2013 | <i>Homo sapiens</i>                |
| G103                                              | LN898099   | Guadeloupe                           | 2014 | <i>Homo sapiens</i>                |
| M105                                              | LN898104   | Martinique                           | 2014 | <i>Homo sapiens</i>                |
| M111                                              | LN898112   | Martinique                           | 2014 | <i>Homo sapiens</i>                |
| JFRO_07                                           | MF001511   | Puerto Rico                          | 2015 | <i>Homo sapiens</i>                |
| Angola M2022                                      | HM045823.1 | Angola                               | 1962 | -                                  |
| KPA15                                             | HQ456254   | Kenya-Mombasa                        | 2004 | <i>Homo sapiens</i>                |
| LAMU33                                            | HQ456255   | Kenya-Lamu                           | 2004 | <i>Homo sapiens</i>                |
| BHI3745/H804709                                   | KP164570   | Brazil                               | 2014 | <i>Homo sapiens</i>                |
| Vereeniging'                                      | HM045792   | South Africa                         | 1956 | <i>Homo sapiens</i>                |
| SAH2123                                           | HM045795   | South Africa                         | 1976 | <i>Homo sapiens</i>                |
| AR 18211                                          | HM045805   | South Africa                         | 1976 | <i>Aedes furcifer</i>              |
| Ross low-psg                                      | HM045811   | Tanzania                             | 1953 | <i>Homo sapiens</i>                |
| A301                                              | HM045821   | Senegal                              | 1963 | <i>Chiroptera</i>                  |
| DakAr B 16878                                     | HM045784   | Central African Republic             | 1984 | <i>Anopheles (Ceilia) funestus</i> |
| LSFS                                              | HM045809   | The Democratic Republic of the Congo | 1960 | <i>Homo sapiens</i>                |
| UgAg4155                                          | HM045812   | Uganda                               | 1982 | <i>Homo sapiens</i>                |
| HB78                                              | HM045822   | Central African Republic             | 1978 | <i>Homo sapiens</i>                |
| BR33                                              | KX228391   | Brazil - Pernambuco                  | 2016 | <i>Homo sapiens</i>                |
| ArB6445                                           | KY038946   | Central African Republic-Bozo        | 1975 | <i>Aedes opok</i>                  |
| HB84P07                                           | KY038947   | Central African Republic             | 1983 | <i>Homo sapiens</i>                |



|                                     |                      |                              |              |                                             |
|-------------------------------------|----------------------|------------------------------|--------------|---------------------------------------------|
| C302F/2016/BR<br>05-209             | KY055011<br>AM258991 | Brazil -Arcaju<br>Seychelles | 2016<br>2005 | <i>Aedes aegypti</i><br><i>Homo sapiens</i> |
| LR2006_OPY1                         | DQ443544.2           | Reunion                      | 2006         | <i>Homo sapiens</i>                         |
| BNI-CHIKV_899                       | FJ959103             | Mauritius                    | 2006         | <i>Homo sapiens</i>                         |
| IMTSSA6424C<br>L2                   | FR717337<br>KF283986 | Reunion<br>Comoros           | 2005<br>2005 | <i>Homo sapiens</i><br><i>Homo sapiens</i>  |
| S7                                  | KF283987.1           | Comoros: Grande Island       | 2005         | -                                           |
| OPY6                                | KP003807             | France                       | 2006         | <i>Homo sapiens</i>                         |
| MADOPY1                             | KP003808             | Madagascar (Francia)         | 2006         | <i>Homo sapiens</i>                         |
| OPY4                                | KP003809             | Mayotte                      | 2006         | <i>Homo sapiens</i>                         |
| LR2006_OPY1                         | KT449801             | Reunion                      | 2006         | <i>Homo sapiens</i>                         |
| DRDE-07                             | EU372006             | India                        | 2007         | <i>Homo sapiens</i>                         |
| LKRGCH1507                          | FJ445428             | Sri Lanka                    | 2007         | <i>Homo sapiens</i>                         |
| SGEHICHS277108                      | FJ445510             | Singapore                    | 2008         | <i>Homo sapiens</i>                         |
| LK(PB)CH5308                        | FJ513635             | Sri Lanka                    | 2008         | <i>Homo sapiens</i>                         |
| 0611aTw                             | FJ807896             | Singapore (Taiwan)           | 2006         | <i>Homo sapiens</i>                         |
| 0810aTw                             | FJ807898             | Bangladesh (Taiwan)          | 2008         | <i>Homo sapiens</i>                         |
| MY/08/068                           | FN295487             | Malaysia                     | 2008         | <i>Homo sapiens</i>                         |
| SL15649                             | GU189061             | Sri Lanka                    | 2006         | <i>Homo sapiens</i>                         |
| SD08Pan                             | GU199351             | Sri Lanka (China)            | 2008         | <i>Homo sapiens</i>                         |
| CU-Chik10                           | GU301780             | Thailand                     | 2008         | <i>Homo sapiens</i>                         |
| CU-Chik683                          | GU301781             | Thailand                     | 2009         | <i>Homo sapiens</i>                         |
| CU-Chik_OBF                         | GU908223             | Thailand                     | 2009         | <i>Aedes albopictus</i>                     |
| GD115                               | HQ846356             | China                        | 2010         | <i>Homo sapiens</i>                         |
| IND-06-Guj                          | JF274082             | India                        | 2006         | <i>Homo sapiens</i>                         |
| V1024313_KH11_PVH                   | JQ861257             | Cambodia                     | 2011         | <i>Homo sapiens</i>                         |
| Yem-11                              | KC614648             | Yemen                        | 2011         | <i>Aedes aegypti</i><br>(mosquito)          |
| NL10/152                            | KC862329             | Indonesia                    | 2010         | <i>Homo sapiens</i>                         |
| Myanmar/D136/2009                   | KF151175             | Myanmar                      | 2009         | <i>Homo sapiens</i>                         |
| 10Mdy105                            | KF590567             | Myanmar                      | 2010         | <i>Homo sapiens</i>                         |
| BK57                                | KJ579185             | Thailand                     | 2013         | <i>Homo sapiens</i>                         |
| CHIKV_STMWG02                       | KJ679578             | India                        | 2011         | <i>Homo sapiens</i>                         |
| RGCB730/09                          | KJ796844             | India                        | 2009         | <i>Homo sapiens</i>                         |
| StBI                                | KP003811             | Italy                        | 2007         | <i>Homo sapiens</i>                         |
| RGCB855/10                          | KT336778             | India                        | 2010         | <i>Homo sapiens</i>                         |
| RGCB1259/12                         | KT336779             | India                        | 2012         | <i>Homo sapiens</i>                         |
| RGCB1431/13                         | KT336782             | India                        | 2013         | <i>Homo sapiens</i>                         |
| CHIKV/Homo sapiens/ITA/Bianchi/2007 | KX262989             | Italy                        | 2007         | <i>Homo sapiens</i>                         |
| JHCK96                              | KX619424             | India                        | 2015         | <i>Homo sapiens</i>                         |
| 119067                              | KY057363             | India                        | 2016         | <i>Homo sapiens</i>                         |
| IN16C1                              | KY751908             | India (Australia)            | 2016         | <i>Homo sapiens</i>                         |
| hk02                                | MF499120             | India (Hong Kong)            | 2016         | <i>Homo sapiens</i>                         |
| Pakistan-04/2016                    | MF774614             | Pakistan                     | 2016         | <i>Homo sapiens</i>                         |
| Pakistan-07/2016                    | MF774617             | Pakistan                     | 2016         | <i>Homo sapiens</i>                         |
| 37997                               | AY726732             | Senegal                      | 1983         | <i>Aedes furcifer</i>                       |
| PM2951                              | HM045785             | Senegal                      | 1966         | <i>Aedes aegypti</i>                        |
| IbH35 (TVP1337)                     | HM045786             | Nigeria                      | 1964         | <i>Homo sapiens</i>                         |
| SH2830                              | HM045798             | Senegal                      | 1966         | <i>Homo sapiens</i>                         |
| IbAn4824                            | HM045807             | Nigeria                      | 1965         | <i>sentinel mouse</i>                       |
| ArD 30237                           | HM045815             | Senegal                      | 1979         | <i>Ae. luteocephalus</i>                    |
| HD 180760                           | HM045817             | Senegal                      | 2005         | <i>Homo sapiens</i>                         |
| ArA 2657                            | HM045818             | Cote d'Ivoire                | 1981         | <i>Ae. luteocephalus</i>                    |
| ArD 93229                           | HM045819             | Senegal                      | 1993         | <i>Ae. dalzieli</i>                         |
| ArA 30548                           | HM045820             | Cote d'Ivoire                | 1993         | <i>Aedes africanus</i>                      |
| CHIKV/Aedes furcifer/SEN/37950/1983 | KX262995             | Senegal                      | 1983         | <i>Ae. furcifer</i>                         |
